# Supplementary material for: The Preclinical Profile of the Duocarmycin-Based HER2-Targeting ADC SYD985 Predicts for Clinical Benefit in Low HER2-Expressing Breast Cancers
Source: Oxford University Press journal article supplement (doi:10.1158/1535-7163.mct-14-0881-t), 2015-01-14
Supplement: 15357163mct140881t-sup-139162_2_supp_2795737_ngzjtj.docx [file 15357163mct140881t-sup-139162_2_supp_2795737_ngzjtj.docx]

**The preclinical profile of the duocarmycin-based HER2-targeting ADC SYD985 predicts for clinical benefit in low HER2-expressing breast cancers.**

Miranda M.C. van der Lee(1), Patrick G. Groothuis(1), Ruud Ubink(1), Monique A.J. van der Vleuten(1), Tanja A. van Achterberg(1), Eline M. Loosveld(1), Désirée Damming(1), Daniëlle C.H. Jacobs(1), Myrthe Rouwette(1), David F. Egging(1), Diels van den Dobbelsteen(1), Patrick H. Beusker(2), Peter Goedings(3), Gijs F.M. Verheijden(4), Jacques M. Lemmens(4), Marco Timmers(4), Wim H.A. Dokter(1)

**Authors’ Affiliations:** Departments of (1)Preclinical; (2)Medicinal & Protein Chemistry; (3)Medical R&D; (4)New Molecular Entities, Synthon Biopharmaceuticals, Nijmegen, the Netherlands.

**Running title:** SYD985 is effective in low HER2-expressing breast cancer.

**Corresponding Author:** Wim Dokter, Synthon Biopharmaceuticals , Microweg 22, 6503 GN Nijmegen, the Netherlands. Tel: +31 (0)24 372 7700, email: Wim.Dokter@Synthon.Com

**Disclosure of potential conflict of interest:** All authors are employees of Synthon Biopharmaceuticals BV. JL owns stock of Synthon BV.

Financial Support of this study came from Synthon Biopharmaceuticals BV.

Supplementary Tables.

**Table S1.** Summary of status of tumors used in cell line and patient-derived xenograft models.

**Table S2.** SYD985 and T-DM1 IC50, 95% confidence interval and % efficacy values from the *in vitro* cytotoxicity assays as depicted in Figure 1B.

**Table S3.** Pharmacokinetic parameters for ADC (SYD985 and T-DM1) in BT-474-tumor-bearing mice after a single i.v. bolus injection of ADC.

Supplementary Figure Legends.

**Figure S1.** *In vitro* cytotoxicity. Comparison of two batches of T-DM1. Four tumor cell lines were treated for 6 days with T-DM1 EU batch N0001B02 or US batch 535405. Induction of cytotoxicity was quantified by measuring the percentage of cell survival

**Figure S2.** **A-G** HER2 expression in BT-474 (**A.**) and breast cancer patient derived xenografts (**B-G**). Tumors were stained with the primary Ab anti-HER2/neu (4B5) rabbit monoclonal on a Discovery automated platform (Ventana-Roche).

**Figure S3.** HER2 cell surface expression quantified on a panel of 8 cell lines using the DAKO Qifikit. HER2 binding sites were saturated with mouse anti-human HER2 MAB1129.

**Figure S4.** *In vitro* cytotoxicity. **A**) Induction of cytotoxicity by *seco*-DUBA quantified after 6 days for the NCI-N87 and UACC-893 cells and after 12 days for the MDA-MB-175-VII and ZR-75-1 cells. **B**) Lack of trastuzumab cytotoxic response on the UACC-893 cells treated for 6 days with trastuzumab and SYD985. **C)** Intact ADC (SYD985 conjugated antibody) concentrations of 100 µg/ml SYD985 after 96 hrs incubation at 37°C in human plasma with increasing concentrations of recombinant mouse carboxylesterase 1c (mCES1c) (± SEM, n=2). **D)** SYD985 and T-DM1 lack cytotoxic activity on HER2-negative NCI-H520 cells measured after 6 days of treatment.

**Figure S5.** *In vitro* bystander killing. (**A**) Cytotoxicity induced on HER2-positive, HER2-negative and co-cultured cells after 12 days of treatment with 1 μg/ml of ADCs or 10 nM of active toxin using the CellTiter-Glo luminescence assay. Percentage survival was calculated related to untreated cells (**B.**) Cytotoxicity induced by different ratios of co-cultured HER2 3+ SK-BR-3 and HER2 0 NCI-H520 cels after treatment of 6 days with 1 µg/ml of ADCs or 10 nM of active toxin, quantified by measuring the percentage of cell survival.

**Figure S6.** Mean ADC (SYD985 conjugated antibody) concentrations in plasma in carboxylesterase CES1c knock-out (-/-) , CES1c heterozygeous (+/-) and CES1c wild type (+/+) mice, after single i.v. bolus injection of SYD985 at 5 mg/kg (+/- SEM, n = 3).

.
